# Supplementary material
Source: publisher figshare collection journal article supplement (https://acs.figshare.com/ndownloader/files/4142191)
Supplement: Supplementary file 1 [file 4142191]

## Supporting Information:

### Screening of Heterogeneous Multimetallic Nanoparticle Catalysts Supported on Metal Oxides for Mono-, Poly-, and Heteroaromatic Hydrogenation

*Nicole A. Beckers, Steven Huynh, Xiaojiang Zhang, Erik J. Lubber, Jillian M. Buriak\**

Department of Chemistry, University of Alberta and the National Institute for Nanotechnology (NINT), Edmonton, Alberta, Canada T6G 2G2

**Table S1.** Quantities of Reagents Required for Desired Support Composition.

| Support Composition                                          | EtOH (ml) | 1.788 M Al(OBu) <sub>3</sub> (ml) | Titanium (IV) isopropoxide (ml) | TEOS (ml) | EtOH/HCl/H <sub>2</sub> O (ml) |
|--------------------------------------------------------------|-----------|-----------------------------------|---------------------------------|-----------|--------------------------------|
| Al <sub>2</sub> O <sub>3</sub>                               | 11.3      | 11.2                              | 0                               | 0         | 8.1                            |
| SiO <sub>2</sub>                                             | 5.6       | 0                                 | 0                               | 2.18      | 4.1                            |
| TiO <sub>2</sub>                                             | 5.6       | 0                                 | 3.0                             | 0         | 4.1                            |
| Al <sub>2</sub> O <sub>3</sub> (25%)- SiO <sub>2</sub> (75%) | 7.0       | 2.8                               | 0                               | 1.64      | 5.1                            |
| Al <sub>2</sub> O <sub>3</sub> (50%)- SiO <sub>2</sub> (50%) | 8.4       | 5.6                               | 0                               | 1.09      | 6.1                            |
| Al <sub>2</sub> O <sub>3</sub> (75%)- SiO <sub>2</sub> (25%) | 9.8       | 8.4                               | 0                               | 0.545     | 7.1                            |
| Al <sub>2</sub> O <sub>3</sub> (25%)- TiO <sub>2</sub> (75%) | 7.0       | 2.8                               | 2.25                            | 0         | 5.1                            |
| Al <sub>2</sub> O <sub>3</sub> (50%)- TiO <sub>2</sub> (50%) | 8.4       | 5.6                               | 1.5                             | 0         | 6.1                            |
| Al <sub>2</sub> O <sub>3</sub> (75%)- TiO <sub>2</sub> (25%) | 9.8       | 8.4                               | 0.75                            | 0         | 7.1                            |
| SiO <sub>2</sub> (25%)- TiO <sub>2</sub> (75%)               | 5.6       | 0                                 | 2.25                            | 0.545     | 4.1                            |
| SiO <sub>2</sub> (50%)- TiO <sub>2</sub> (50%)               | 5.6       | 0                                 | 1.5                             | 1.09      | 4.1                            |
| SiO <sub>2</sub> (75%)- TiO <sub>2</sub> (25%)               | 5.6       | 0                                 | 0.75                            | 1.635     | 4.1                            |

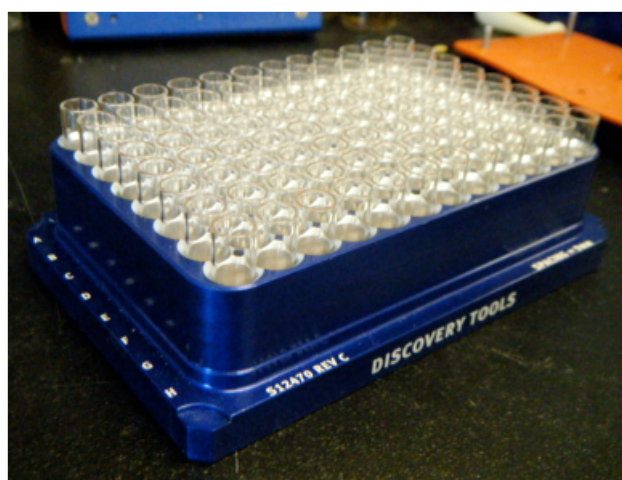

**Figure S1.** Screening plate containing 96 vials.

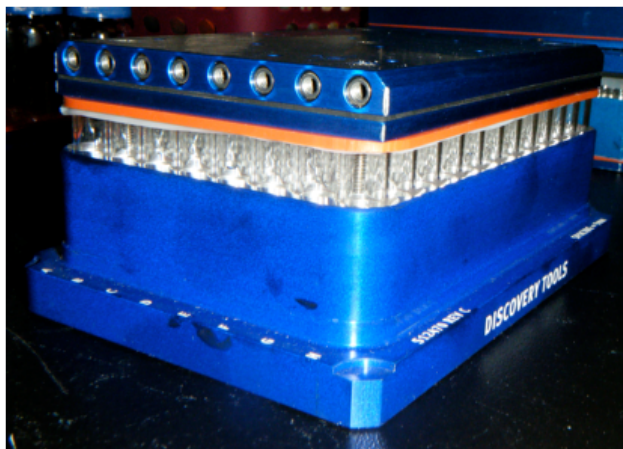

**Figure S2.** Assembled screening plate with top plate.

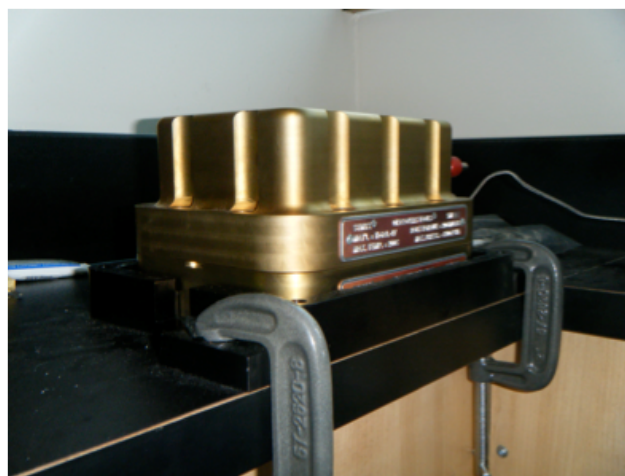

**Figure S3.** Batch reactor.

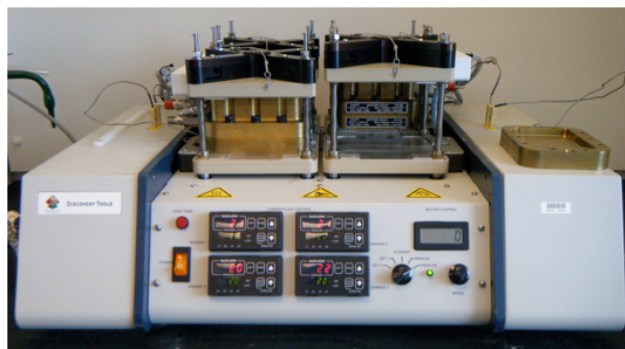

**Figure S4.** Heated orbital shaker system (HOSS).

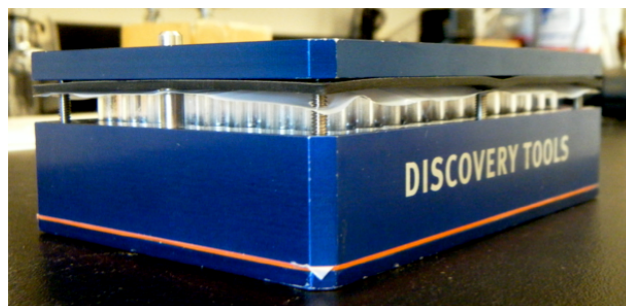

**Figure S5.** Plate used for GC-MS analysis.

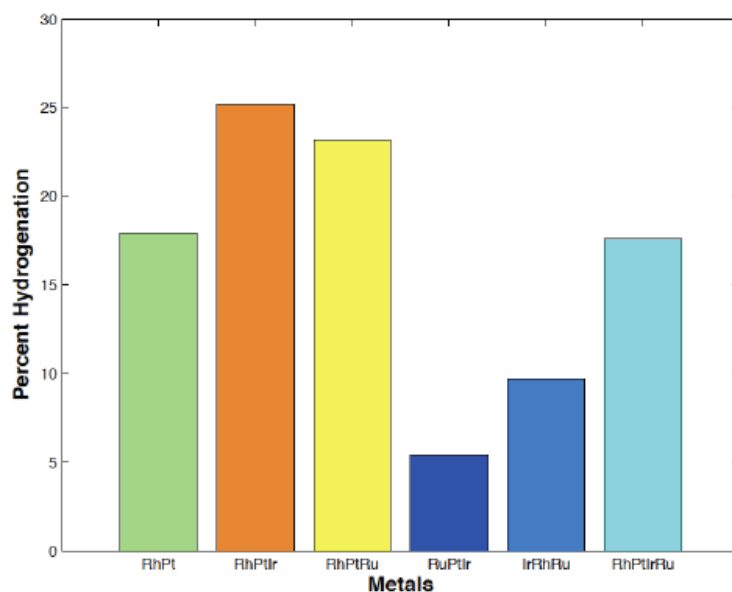

**Figure S6.** Tri- and tetra-metallic toluene hydrogenation results. All of the catalysts were supported on  $\text{Al}_2\text{O}_3$  and had a total metal loading of 1%. The percent hydrogenation of toluene was measured after 4 hours and was determined by gas chromatography.

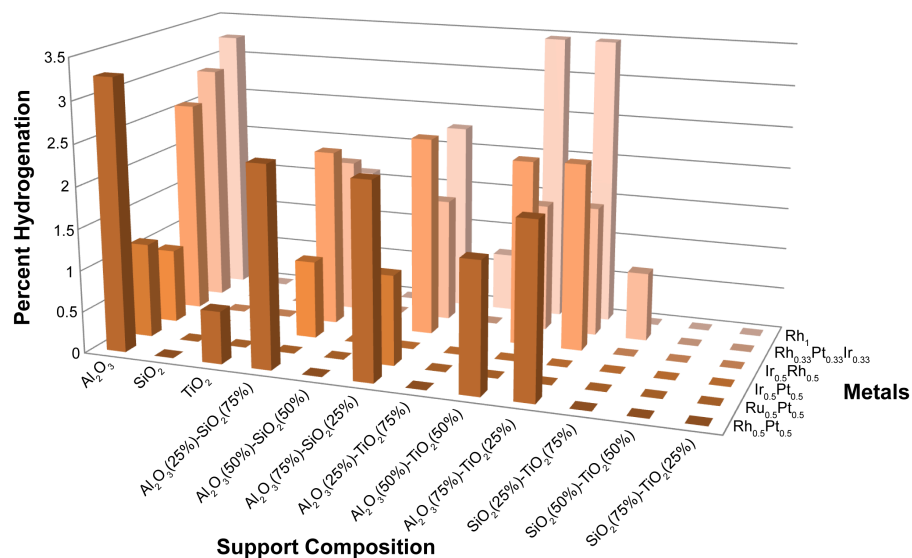

**Figure S7.** Benzothiophene screening results.

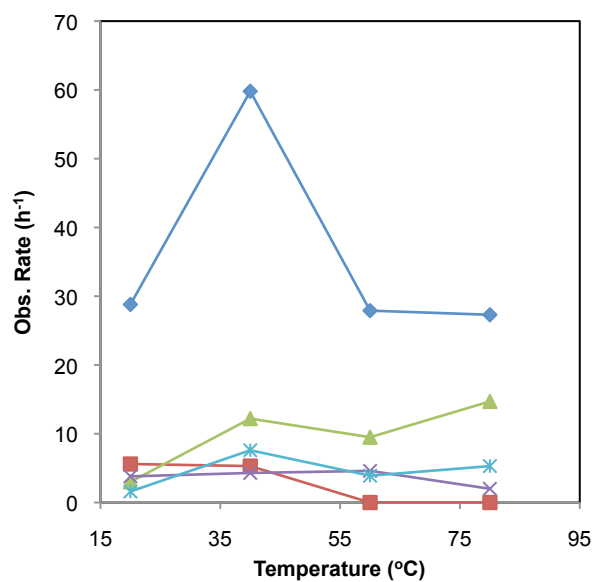

**Figure S8.** Observed initial rates for the hydrogenation of naphthalene at 20 atm H<sub>2</sub> and various temperatures using select catalysts. Blue: commercial 0.5% Rh/Al<sub>2</sub>O<sub>3</sub> catalyst. Red: Rh<sub>1</sub>/Al<sub>2</sub>O<sub>3</sub>(25%)-SiO<sub>2</sub>(75%) catalyst. Green: Rh<sub>1</sub>/Al<sub>2</sub>O<sub>3</sub> catalyst. Purple: Rh<sub>0.5</sub>Pt<sub>0.5</sub>/Al<sub>2</sub>O<sub>3</sub> catalyst. Turquoise: Rh<sub>0.33</sub>Pt<sub>0.33</sub>Ir<sub>0.33</sub>/Al<sub>2</sub>O<sub>3</sub> catalyst.

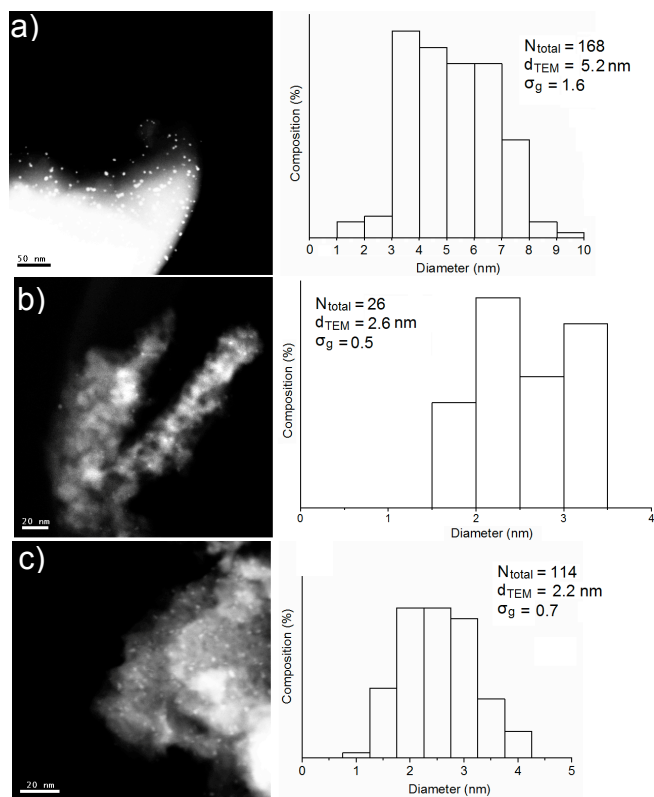

**Figure S9.** Pre-catalysis TEM images and NP size histograms of a) Rh<sub>1</sub>/SiO<sub>2</sub>, b) Rh<sub>1</sub>/Al<sub>2</sub>O<sub>3</sub>, and c) Rh<sub>1</sub>/TiO<sub>2</sub>.

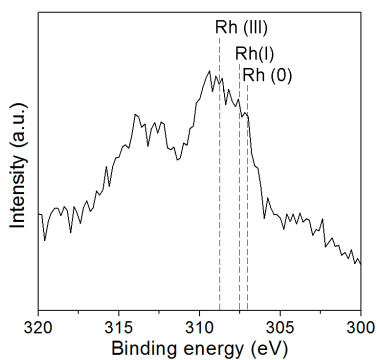

**Figure S10.** Pre-catalysis high resolution XPS spectra of Rh in Rh<sub>1</sub>/Al<sub>2</sub>O<sub>3</sub>(25%)-SiO<sub>2</sub>(75%). The Rh 3d peak binding energy is 308.7 eV, which suggests that the Rh is oxidized to Rh(III).

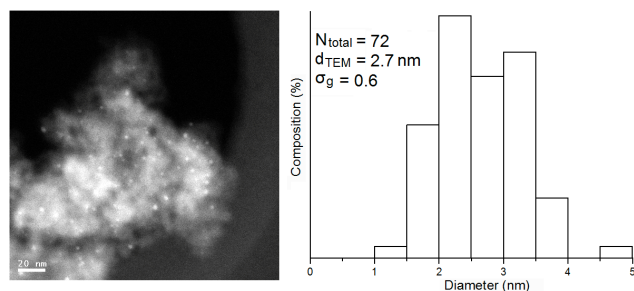

**Figure S11.** Pre-catalysis TEM images and particle size histograms for

$\text{Rh}_{0.33}\text{Pt}_{0.33}\text{Ir}_{0.33}/\text{Al}_2\text{O}_3$ .

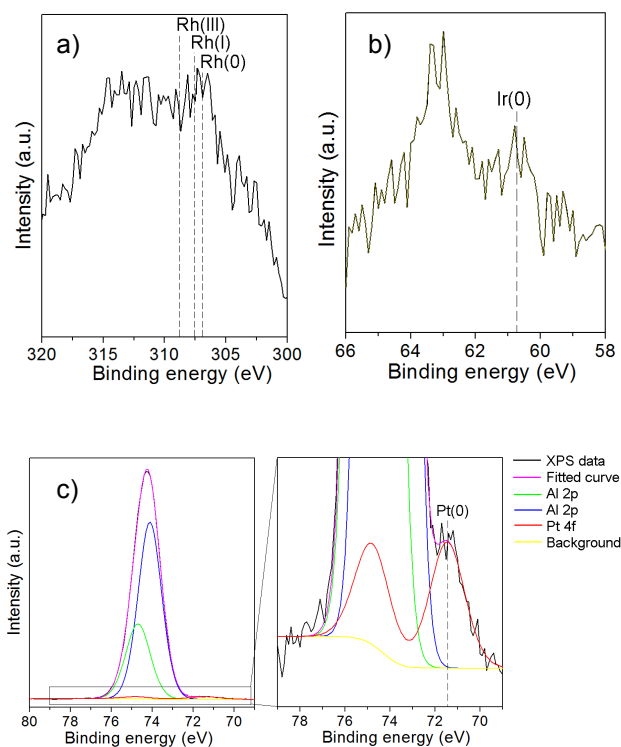

**Figure S12.** Pre-catalysis high resolution XPS spectra of a) Rh, b) Ir and c) Pt in

$\text{Rh}_{0.33}\text{Pt}_{0.33}\text{Ir}_{0.33}/\text{Al}_2\text{O}_3$ . The Rh 3d peak has a binding energy of 306.9 eV indicating that it is in the zero oxidation state. The apparent Ir 4f<sub>7/2</sub> peak is at 60.7 eV, which corresponds to Ir(0). The Pt 4f peak at 71.4 eV indicates that it is Pt(0).

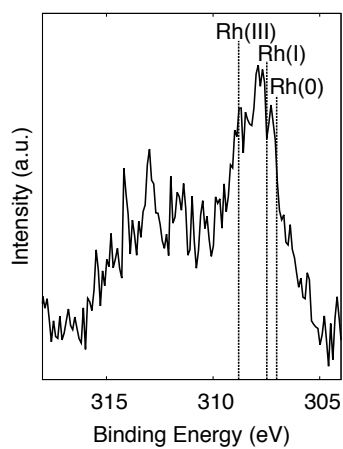

**Figure S13.** Pre-catalysis high resolution XPS spectra of Rh in Rh<sub>1</sub>/Al<sub>2</sub>O<sub>3</sub>. The Rh 3d peak has a binding energy of 308.0 eV, suggesting that the Rh is slightly oxidized.

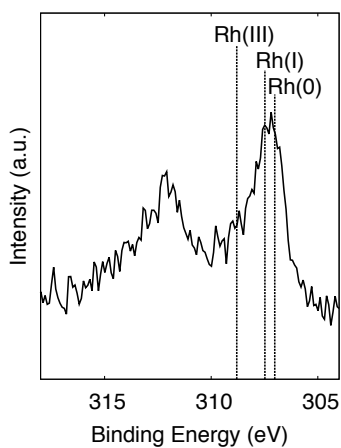

**Figure S14.** Pre-catalysis high resolution XPS spectra of Rh in Rh<sub>1</sub>/SiO<sub>2</sub>. The Rh 3d peak has a binding energy of 307.4 eV.

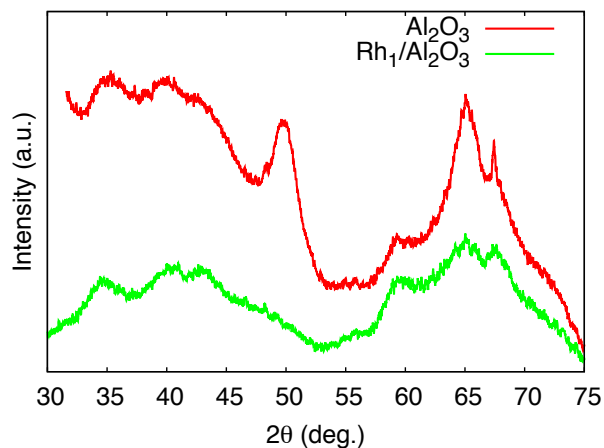

**Figure S15.** XRD patterns of  $\text{Al}_2\text{O}_3$  and  $\text{Rh}_1/\text{Al}_2\text{O}_3$ .

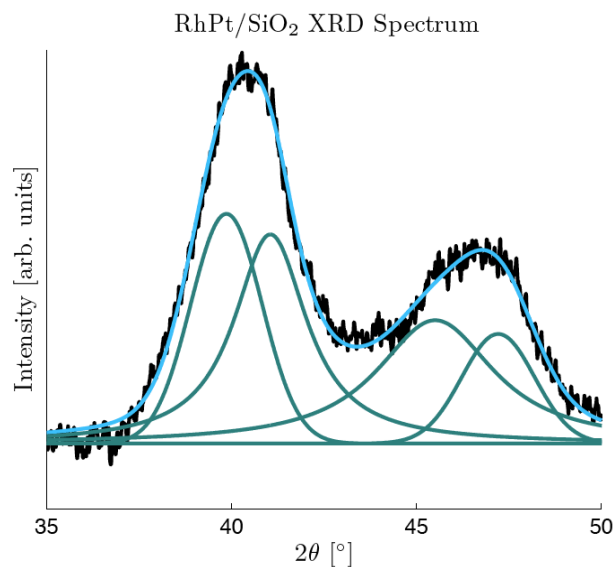

**Fig. S16.** Fitting procedure for  $\text{Rh}_{0.5}\text{Pt}_{0.5}/\text{SiO}_2$  sample. In order to determine the integral breadth and peak centre, the XRD profile is fit to a series of Lorentzian peaks after background subtraction. The grain size is determined via the Scherrer equation:  $D = \lambda / (\beta * \cos(\theta))$  where  $\lambda$  is the wavelength of the probing radiation (1.54056 Angstrom),  $\beta$  is the integral width of the fit peak and  $\theta$  is centre position of the peak.
